# Supplementary material
Source: Springer Nature journal article supplement (https://www.springermedizin.de/resource/supplementary/12885_2010_2820_MOESM5_ESM.pdf/9462016)

## Breast carcinomas with MD

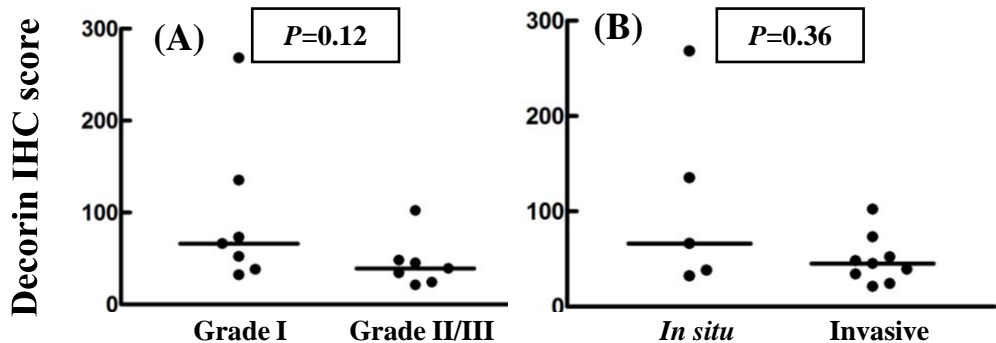

## Breast carcinomas with MAMCs

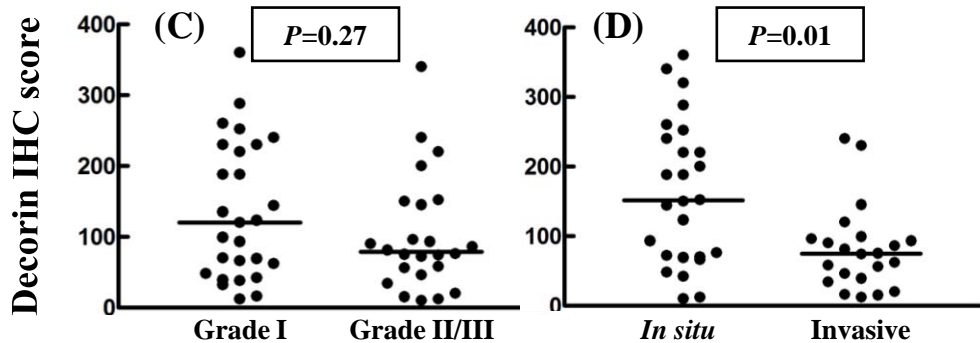

Supplement: MOESM5 [file 9462016]
